# Supplementary material for: Vitamin D3 Supplementation Increases Long-Chain Ceramide Levels in Overweight/Obese African Americans: A Post-Hoc Analysis of a Randomized Controlled Trial
Source: PubMed Central journal article supplement (PMC7230674; doi:10.3390/nu12040981), 2020-04-02
Supplement: nutrients-12-00981-s001.pdf [file nutrients-12-00981-s001.pdf]

**Table S1. Raw changes in 25(OH)D and sphingolipids.**

| <b>Metabolites</b> |         | <b>Placebo</b> | <b>600 IU/day</b> | <b>2000 IU/day</b> | <b>4000 IU/day</b> |
|--------------------|---------|----------------|-------------------|--------------------|--------------------|
| 25(OH)D            | Pre     | 39.7±14.7      | 35.0±7.7          | 39.8±10.7          | 32.9±10.3          |
|                    | Post    | 42.0±12.1      | 56.5±12.2         | 90.0±32.2          | 83.2±21.0          |
|                    | Changes | 2.2±13.0       | 21.5±11.2         | 50.2±27.1          | 50.3±19.6          |
|                    | p-value | 0.501          | <0.001            | <0.001             | <0.001             |
| C16Cer             | Pre     | 0.99±0.31      | 1.11±0.41         | 1.03±0.26          | 0.93±0.16          |
|                    | Post    | 0.98±0.28      | 1.10±0.38         | 1.05±0.24          | 1.00±0.23          |
|                    | Changes | -0.01±0.10     | -0.00±0.22        | 0.01±0.19          | 0.07±0.18          |
|                    | p-value | 0.766          | 0.965             | 0.787              | 0.164              |
| C18Cer             | Pre     | 1.02±0.43      | 1.17±0.56         | 1.03±0.44          | 0.95±0.22          |
|                    | Post    | 0.87±0.39      | 1.19±0.52         | 1.10±0.50          | 1.12±0.41          |
|                    | Changes | -0.15±0.30     | 0.02±0.28         | 0.08±0.29          | 0.17±0.28          |
|                    | p-value | 0.074          | 0.784             | 0.307              | 0.034              |
| C16dhCer           | Pre     | 1.08±0.50      | 1.13±0.74         | 1.24±0.65          | 1.21±0.54          |
|                    | Post    | 1.13±0.39      | 1.16±0.58         | 1.22±0.56          | 1.32±0.56          |
|                    | Changes | 0.05±0.40      | 0.03±0.38         | -0.02±0.56         | 0.11±0.39          |
|                    | p-value | 0.628          | 0.735             | 0.875              | 0.289              |
| C18dhCer           | Pre     | 1.14±0.77      | 1.12±0.85         | 1.08±0.97          | 1.15±1.08          |
|                    | Post    | 0.98±0.99      | 1.00±0.78         | 1.38±1.52          | 1.35±1.29          |
|                    | Changes | -0.16±1.10     | -0.13±0.56        | 0.30±0.73          | 0.20±0.92          |
|                    | p-value | 0.557          | 0.404             | 0.111              | 0.406              |
| Sphingosine        | Pre     | 1.05±0.68      | 0.85±0.37         | 1.07±0.59          | 0.92±0.39          |
|                    | Post    | 0.90±0.41      | 0.75±0.36         | 0.94±0.66          | 0.72±0.32          |
|                    | Changes | -0.15±0.55     | -0.11±0.59        | -0.13±0.44         | -0.20±0.45         |
|                    | p-value | 0.307          | 0.498             | 0.256              | 0.094              |
| S1P                | Pre     | 1.08±0.28      | 1.04±0.25         | 1.09±0.28          | 1.11±0.30          |
|                    | Post    | 1.05±0.31      | 0.96±0.25         | 1.21±0.24          | 0.98±0.26          |
|                    | Changes | -0.03±0.27     | -0.07±0.25        | 0.03±0.32          | -0.13±0.25         |
|                    | p-value | 0.652          | 0.290             | 0.683              | 0.057              |
| C16SM              | Pre     | 0.99±0.19      | 1.05±0.23         | 1.03±0.19          | 0.98±0.10          |
|                    | Post    | 1.00±0.18      | 1.10±0.23         | 1.09±0.20          | 1.04±0.16          |
|                    | Changes | 0.01±0.11      | 0.05±0.11         | 0.06±0.08          | 0.07±0.11          |
|                    | p-value | 0.728          | 0.095             | 0.010              | 0.024              |
| C18SM              | Pre     | 1.01±0.24      | 1.10±0.35         | 1.05±0.31          | 0.95±0.15          |
|                    | Post    | 0.95±0.28      | 1.10±0.33         | 1.14±0.33          | 1.08±0.22          |
|                    | Changes | -0.06±0.23     | 0.01±0.18         | 0.10±0.19          | 0.13±0.17          |
|                    | p-value | 0.326          | 0.891             | 0.055              | 0.008              |

**Table S2.** Adjusted associations between sphingolipids and 25(OH)D concentrations at baseline\*.

| Metabolites | 25(OH)D      |              |
|-------------|--------------|--------------|
|             | $\beta$      | P            |
| C16Cer      | -0.67        | 0.150        |
| C18Cer      | -0.47        | 0.233        |
| C16dhCer    | -0.58        | 0.230        |
| C18dhCer    | -0.24        | 0.513        |
| Sphingosine | 0.18         | 0.684        |
| S1P         | 0.41         | 0.372        |
| C16SM       | <b>-1.29</b> | <b>0.004</b> |
| C18SM       | -0.78        | 0.061        |

\* Linear regression models were adjusted for age, sex, and BMI. Levels of metabolites were standardized. Serum 25(OH)D concentrations were log transformed. Abbreviations: C16Cer, N-palmitoyl-sphingosine (d18:1/16:0); C18Cer, N-stearoyl-sphingosine (d18:1/18:0); C16dhCer, N-palmitoyl-sphinganine (d18:0/16:0); C18dhCer, N-stearoyl-sphinganine (d18:0/18:0); S1P, sphingosine 1-phosphate; C16SM, palmitoyl sphingomyelin (d18:1/16:0); C18SM, stearoyl sphingomyelin (d18:1/18:0).

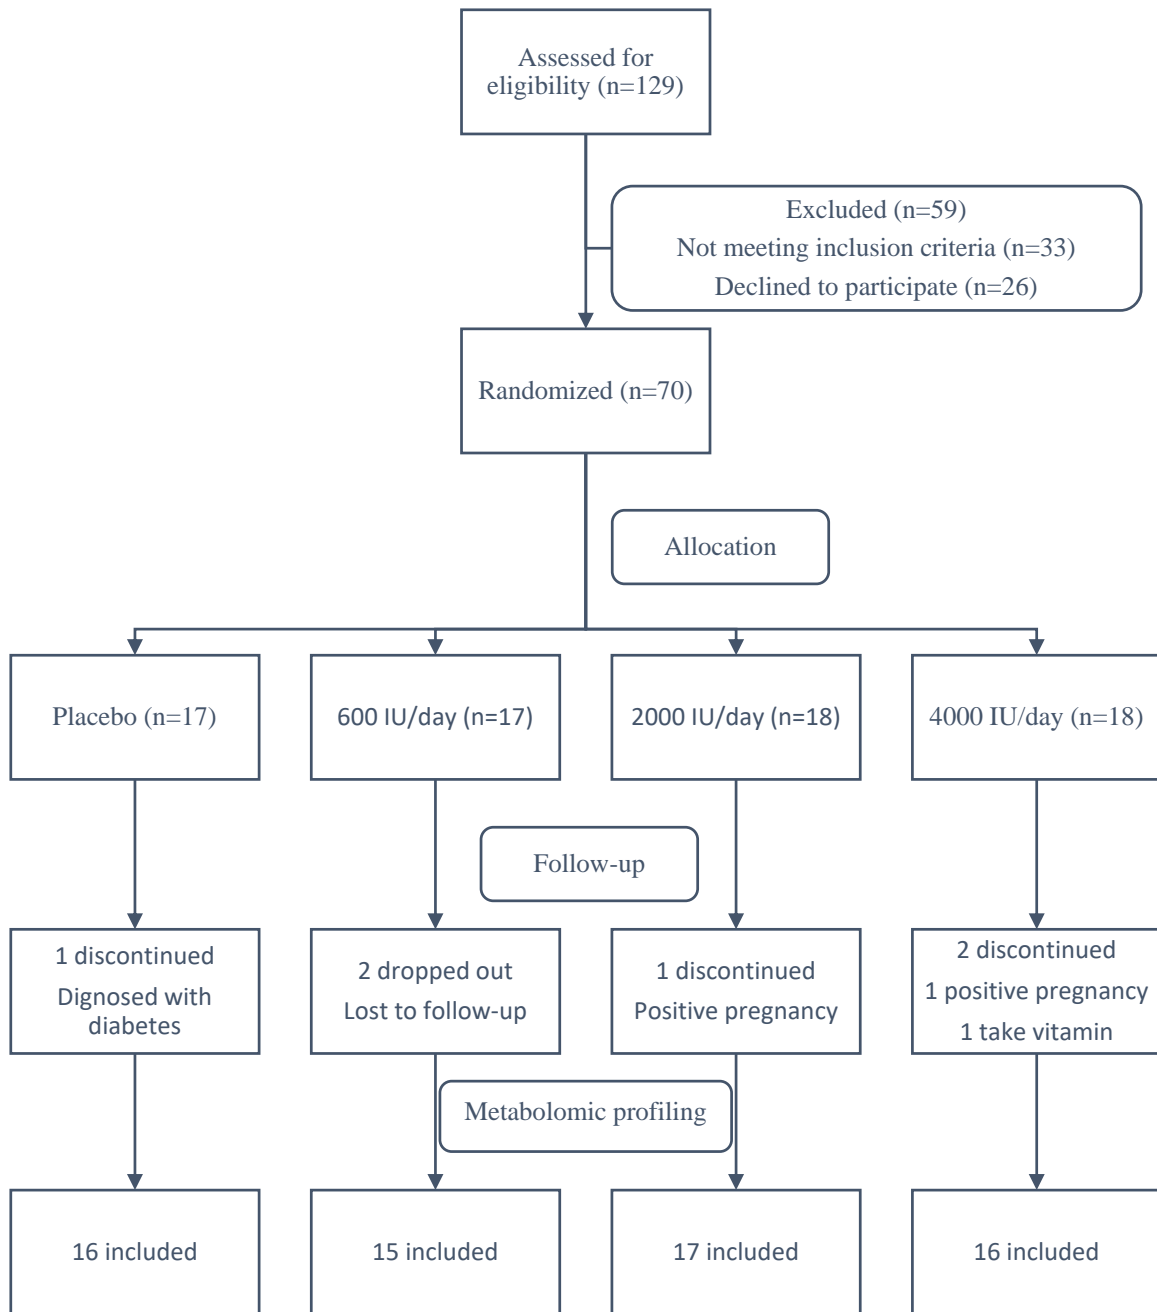

**Figure S1. Flow diagram of participants.**

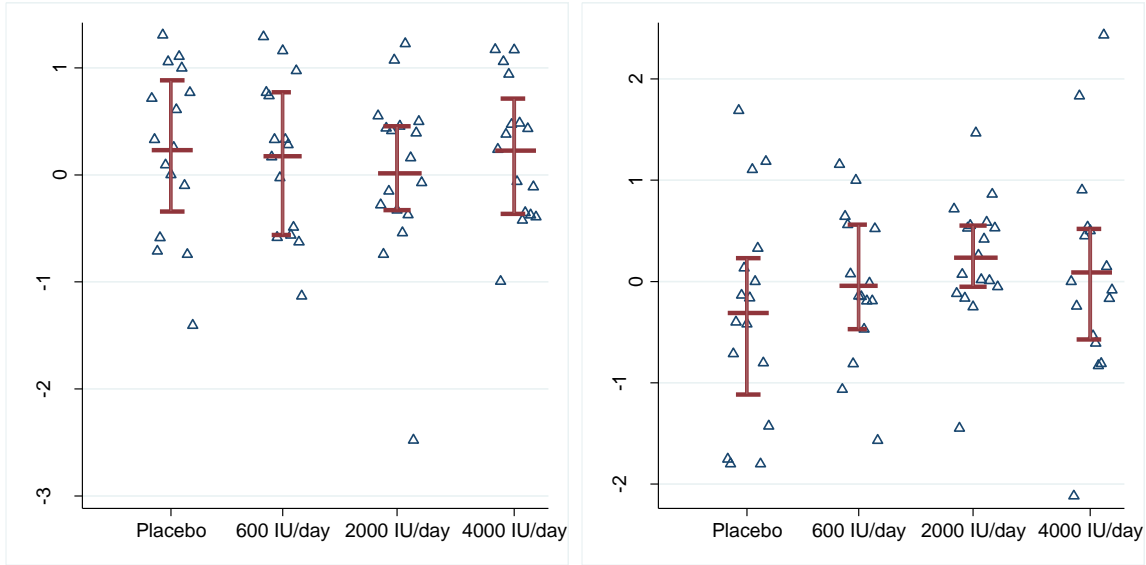

**Figure S2. Effect of vitamin D<sub>3</sub> supplementation on serum dihydroceramide levels.** Left is C16dhCer, and right is C18dhCer. Y-axis is the change of standardized levels of dihydroceramide (dhCer). Red lines indicate 25 percentile, mean and 75 percentile of standardized levels of dhCer in each group. Abbreviations: C16dhCer, N-palmitoyl-sphinganine (d18:0/16:0); C18dhCer, N-stearoyl-sphinganine (d18:0/18:0).

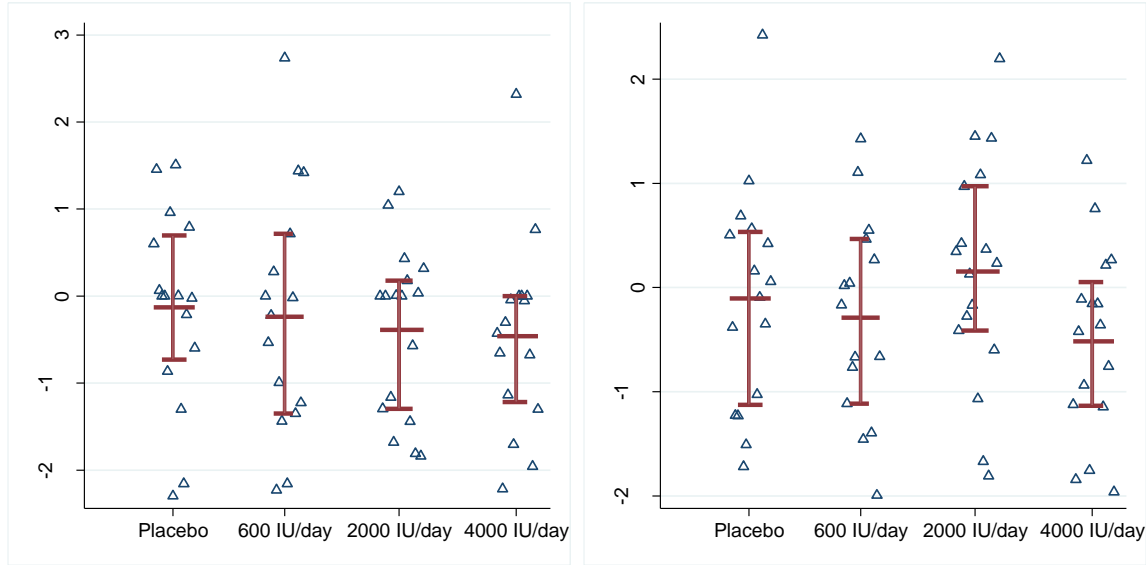

**Figure S3. Effect of vitamin D<sub>3</sub> supplementation on serum sphingosine and 1-phosphate derivate levels.** Left is sphingosine, and right is S1P. Y-axis is the change of standardized levels of the metabolites. Red lines indicate 25 percentile, mean and 75 percentile of standardized levels of metabolites in each group. Abbreviations: S1P, sphingosine 1-phosphate.

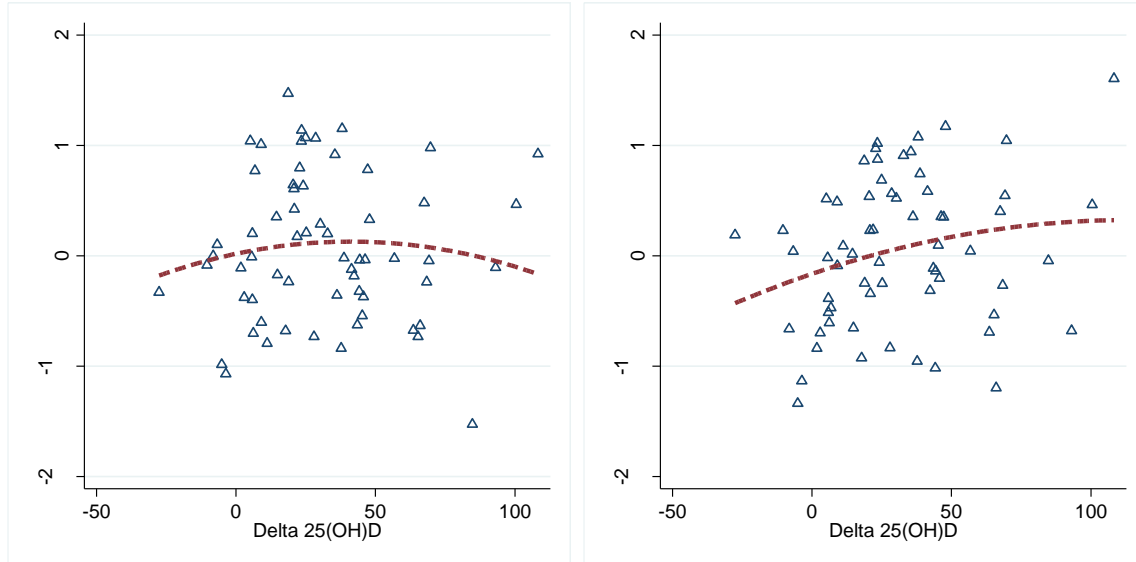

**Figure S4. Associations between the changes of ceramides and 25(OH)D concentrations.** Left is C16Cer, and right is C18Cer. Y-axis is the change of standardized levels of Cer. Red line is the quadratic prediction.

Abbreviations: C16Cer, N-palmitoyl-sphingosine (d18:1/16:0); C18Cer, N-stearoyl-sphingosine (d18:1/18:0).

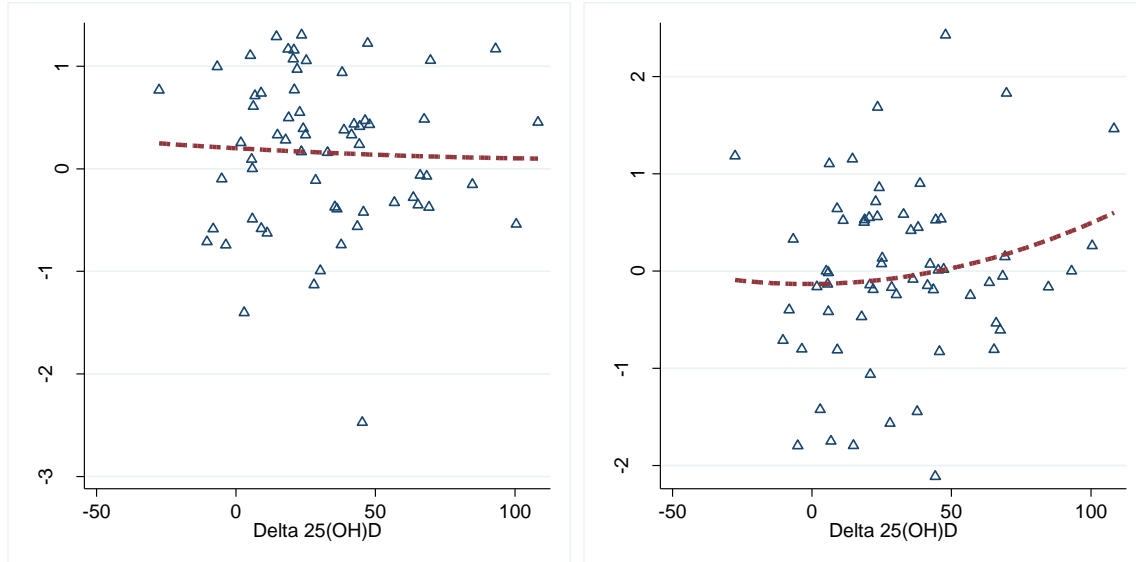

**Figure S5. Associations between the changes of dihydroceramide and 25(OH)D concentrations.** Left is C16dhCer, and right is C18dhCer. Y-axis is the change of standardized levels of dihydroceramide (dhCer). Red line is the quadratic prediction. Abbreviations: C16dhCer, N-palmitoyl-sphinganine (d18:0/16:0); C18dhCer, N-stearoyl-sphinganine (d18:0/18:0).

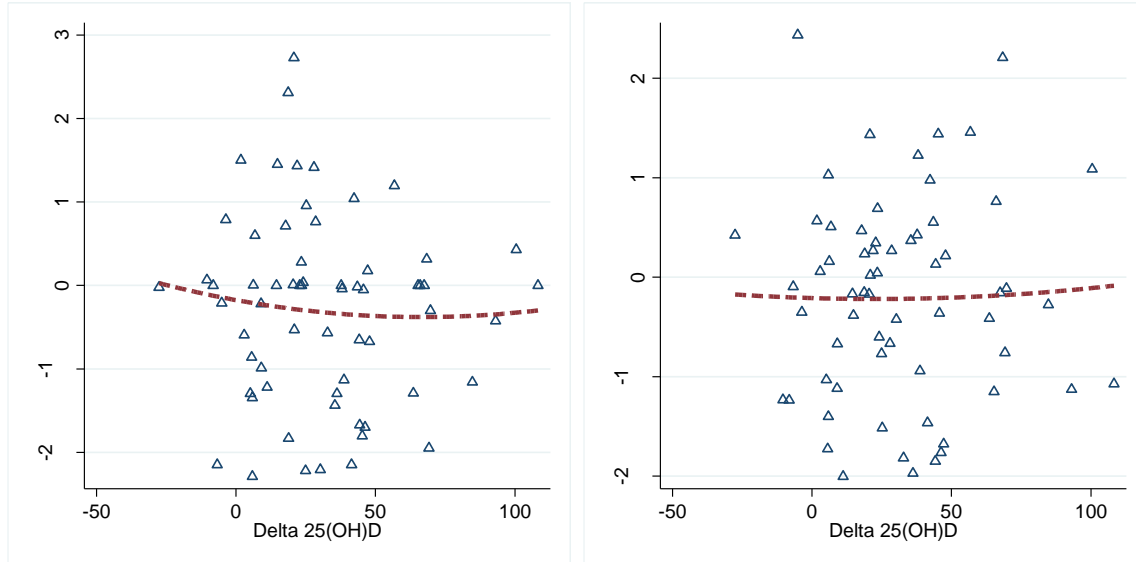

**Figure S6. Associations between the changes of sphingosine, 1-phosphate derivate and 25(OH)D concentrations.** Left is sphingosine, and right is S1P. Y-axis is the change of standardized levels of Cer. Red line is the quadratic prediction. Abbreviations: S1P, sphingosine 1-phosphate.



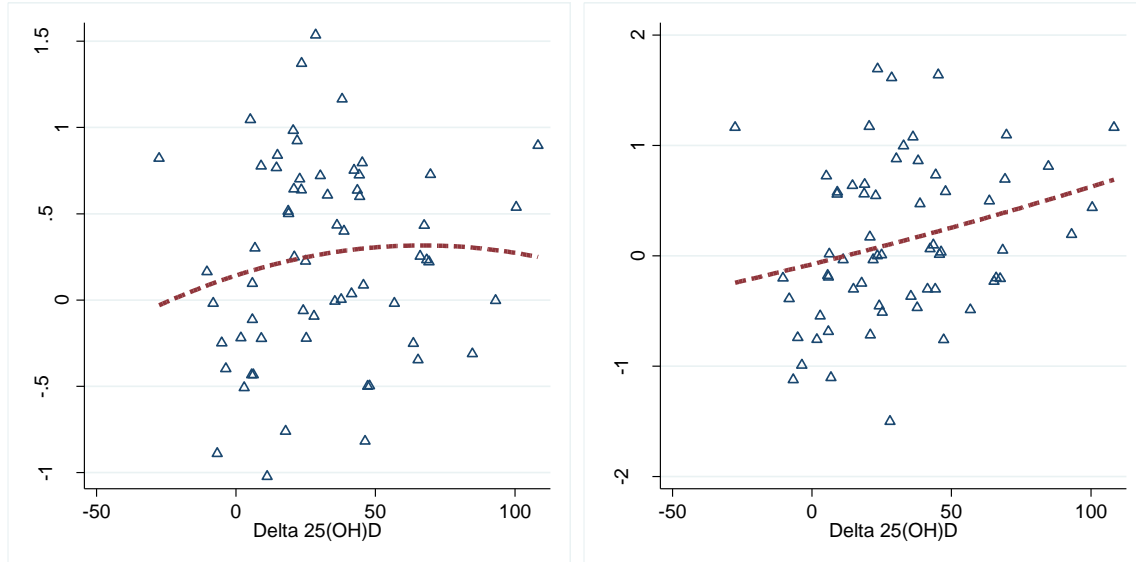

**Figure S7. Associations between the changes of sphingomyelin and 25(OH)D concentrations.** Left is C16SM, and right is C18SM. Y-axis is the change of standardized levels of SM. Red line is the quadratic prediction. Abbreviations: C16SM, palmitoyl sphingomyelin (d18:1/16:0); C18SM, stearoyl sphingomyelin (d18:1/18:0).

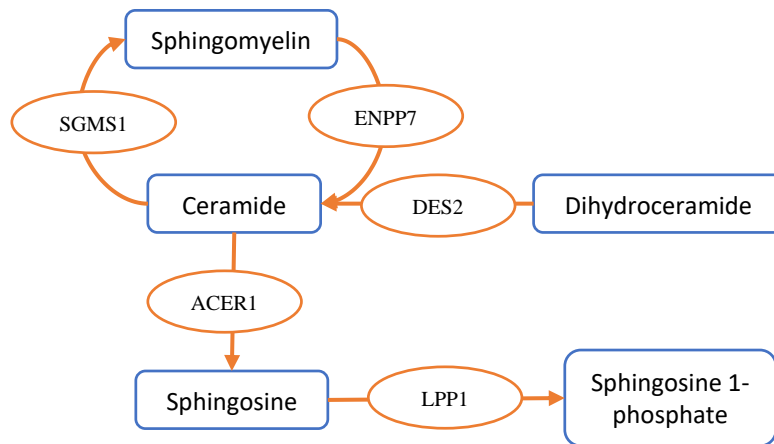

**Figure S8. Sphingolipid metabolism.** Dihydroceramide (dhCer) is the precursor of Cer, and can be synthesized through N-acylation dihydrosphingosine by one of six ceramide synthases (CerS1-CerS6), each using specific acyl chains. dhCer then dehydrogenated to Cers by dihydroceramide desaturase 2 (Des2). Sphingosine and sphingosine 1-phosphate (S1P) are the degradation products of Cers by alkaline ceramidase 1 (Acer1). Cer and SM are able to transform to each other with the help of ectonucleotide pyrophosphatase/phosphodiesterase family member 7 (Enpp7), and phosphatidylcholine: ceramide cholinephosphotransferase 1 (SGMS1). Abbreviations: Enpp7, Ectonucleotide pyrophosphatase/phosphodiesterase family member 7; SGMS1, Phosphatidylcholine:ceramide cholinephosphotransferase 1; DES2, Sphingolipid delta(4)-desaturase/C4-hydroxylase DES2; ACER1, Alkaline ceramidase 1; LPP1, lipid phosphate phosphohydrolase 1.
